# Supplementary material for: Comparison of Pollutant Effects on Cutaneous Inflammasomes Activation
Source: MDPI journal article supplement (doi:10.3390/ijms242316674), 2023-11-23
Supplement: s1 [file s1]

## Supplementary figure S1

### 1. OXIDATIVE STRESS

|                   | Markers | DAY 1                        | DAY 4                        |
|-------------------|---------|------------------------------|------------------------------|
| Expression levels | 4HNE    | MP,UV,DEE,O <sub>3</sub>     | MP,UV,DEE                    |
|                   | SESN2   | MP,DEE,CS,O <sub>3</sub> ,UV | O <sub>3</sub> ,CS,MP,DEE,UV |

### 2. DNA DAMAGE

|                   | Markers | DAY 1                       | DAY 4                       |
|-------------------|---------|-----------------------------|-----------------------------|
| Expression levels | 8-OHdG  | CS,DEE,UV,MP,O <sub>3</sub> | UV,MP,DEE,CS,O <sub>3</sub> |

### 3. SKIN AGING

|                   | Markers         | DAY 1  | DAY 4                        |
|-------------------|-----------------|--------|------------------------------|
| Expression levels | MMP2            | x      | UV,CS,O <sub>3</sub> ,MP,DEE |
|                   | Type I Collagen | MP,DEE | DEE,UV,MP                    |

### 4. INFLAMMATION (INFLAMMASOMES ACTIVATION)

|                           | Markers | DAY 1                        | DAY 4                       |
|---------------------------|---------|------------------------------|-----------------------------|
| Gene expression           | NLRP3   | CS                           | UV                          |
|                           | NLRP1   | O <sub>3</sub> ,CS           | UV,CS,MP,DEE,O <sub>3</sub> |
|                           | NLRC4   | UV,CS                        | x                           |
|                           | NLRP6   | O <sub>3</sub> ,CS           | UV,MP,CS,DEE,O <sub>3</sub> |
| Expression levels<br>NLRs | NLRP3   | DEE                          | x                           |
|                           | NLRP1   | O <sub>3</sub> ,UV,CS,MP,DEE | CS,O <sub>3</sub> ,UV,DEE   |
|                           | NLRC4   | UV                           | x                           |

|                              |                 |                           |                               |
|------------------------------|-----------------|---------------------------|-------------------------------|
|                              | NLRP6           | O <sub>3</sub> ,MP,CS,UV  | O <sub>3</sub>                |
| Colocalization<br>NLRs-ASC   | NLRP3-ASC       | x                         | DEE,MP                        |
|                              | NLRP1-ASC       | MP,DEE,CS                 | O <sub>3</sub> ,UV,DEE,CS,MP  |
|                              | NLRC4-ASC       | x                         | x                             |
|                              | NLRP6-ASC       | x                         | x                             |
| Protein expression<br>levels | ASC             | UV,CS,O <sub>3</sub> ,DEE | MP,CS,DEE,UV                  |
|                              | p30-Gasdermin D | O <sub>3</sub> ,UV, MP,   | CS,UV,MP, O <sub>3</sub> ,DEE |
|                              | IL-1 $\beta$    | O <sub>3</sub> ,MP        | UV,DEE,MP                     |

**Figure S1.** List of the environmental pollutants affecting markers of oxidative stress, DNA damage, skin aging and inflammasomes components in human skin biopsies after one day (DAY 1) or 4 days (DAY 4) of exposure. The order of the environmental pollutants is listed in a decreasing manner, starting from the one with the major impact (red) to the one with the lowest effect on the mentioned markers. The “x” means no impact from any air pollutants.
